# Supplementary material for: Understanding arsenic mobilization using reactive transport modeling of groundwater hydrochemistry in the Datong basin study plot, China
Source: Royal Society of Chemistry journal article supplement (doi:10.1039/c5em00621j), 2016-01-01
Supplement: c5em00621j2.pdf [file c5em00621j2.pdf]

chemical.out

1/24/2016

# Datong Basin Arsenic Analysis'

'-----'  
'DEFINITION OF THE GEOCHEMICAL SYSTEM'

'PRIMARY SPECIES'

alo2-

ca+2

cl-

h+

h2o

hco3-

k+

mg+2

na+

sio2(aq)

so4-2

fe+2

hs-

mn+2

fe+3

nh4+

h2aso3-

h2aso4-

\*

AQUEOUS COMPLEXES

as (oh) 3 (aq)

aso2-

aso2oh-2

aso4-3

cacl+

cacl2(aq)

caco3(aq)

cahco3+

caoh+

caso4(aq)

fe (oh) 2 (aq)

fe (oh) 2+

fe (oh) 3 (aq)

fe (oh) 3-

fe (oh) 4-

fecl+

fecl2(aq)

feco3(aq)

feco3+

fehco3+

feoh+

feoh+2

feso4(aq)  
 h2s(aq)  
 h2sio4-2  
 h2so4(aq)  
 h3aso4(aq)  
 halo2(aq)  
 haso2(aq)  
 haso4-2  
 hass2(aq)  
 hcl(aq)  
 hsio3-  
 hso4-  
 kcl(aq)  
 khso4(aq)  
 koh(aq)  
 kso4-  
 mgcl+  
 mgco3(aq)  
 mghco3+  
 mgso4(aq)  
 mn(oh)2(aq)  
 mn(oh)3-  
 mn2(oh)3+  
 mn2oh+3  
 mncl+  
 mncl2(aq)  
 mnco3(aq)  
 mnhco3+  
 mnoh+  
 mnso4(aq)  
 naalo2(aq)  
 nacl(aq)  
 naco3-  
 nah3sio4(aq)  
 nahco3(aq)  
 naoh(aq)  
 naso4-  
 nh3(aq)  
 nh4so4-  
 al+3  
 co3-2  
 oh-  
 \*

'MINERALS'

|         |       |       |   |   |
|---------|-------|-------|---|---|
| calcite |       |       | 0 | 0 |
| 0.000   | 0.000 | 0.000 |   |   |

|             |       |            |         |        |       |       |                 |   |
|-------------|-------|------------|---------|--------|-------|-------|-----------------|---|
| mackinawite |       |            | 0       | 0      |       |       |                 |   |
| 0.000       | 0.000 | 0.000      |         |        |       |       |                 |   |
| orpiment    |       |            | 0       | 0      |       |       |                 |   |
| 0.000       | 0.000 | 0.000      |         |        |       |       |                 |   |
| albite      |       |            | 1       | 3      |       |       |                 |   |
| 0.251E-15   | 2     | 1.000      | 1.000   | 69.800 | 0.000 | 0.000 | 0.000           |   |
| 2           |       |            |         |        |       |       |                 |   |
|             |       | 0.6918E-10 | 65.0000 | 1      | h+    |       | 0.4570          |   |
|             |       | 0.2512E-15 | 71.0000 | 1      | h+    |       | -0.5720         |   |
| 0.251E-15   | 0     | 1.000      | 1.000   | 69.800 | 0.000 | 0.000 | 0.0000.5600E-01 | 0 |
| 0.000       | 0.000 | 0.000      |         |        |       |       |                 |   |
| annite      |       |            | 1       | 1      |       |       |                 |   |
| 0.282E-13   | 2     | 1.000      | 1.000   | 22.000 | 0.000 | 0.000 | 0.000           |   |
| 2           |       |            |         |        |       |       |                 |   |
|             |       | 0.1413E-11 | 22.0000 | 1      | h+    |       | 0.3700          |   |
|             |       | 0.2818E-14 | 22.0000 | 1      | h+    |       | -0.2200         |   |
| illite      |       |            | 1       | 3      |       |       |                 |   |
| 0.166E-12   | 2     | 1.000      | 1.000   | 35.000 | 0.000 | 0.000 | 0.000           |   |
| 2           |       |            |         |        |       |       |                 |   |
|             |       | 0.1047E-10 | 23.6000 | 1      | h+    |       | 0.3400          |   |
|             |       | 0.3020E-16 | 58.8000 | 1      | h+    |       | -0.4000         |   |
| 0.166E-12   | 0     | 1.000      | 1.000   | 35.000 | 0.000 | 0.000 | 0.0000.2040E+00 | 0 |
| 0.000       | 0.000 | 0.000      |         |        |       |       |                 |   |
| k-feldspar  |       |            | 1       | 3      |       |       |                 |   |
| 0.389E-12   | 2     | 1.000      | 1.000   | 38.000 | 0.000 | 0.000 | 0.000           |   |
| 2           |       |            |         |        |       |       |                 |   |
|             |       | 0.8710E-10 | 51.7000 | 1      | h+    |       | 0.5000          |   |
|             |       | 0.6310E-21 | 94.1000 | 1      | h+    |       | -0.8230         |   |
| 0.389E-12   | 0     | 1.000      | 1.000   | 38.000 | 0.000 | 0.000 | 0.0000.9000E-02 | 0 |
| 0.000       | 0.000 | 0.000      |         |        |       |       |                 |   |
| quartz      |       |            | 1       | 3      |       |       |                 |   |
| 0.102E-13   | 0     | 1.000      | 1.000   | 87.700 | 0.000 | 0.000 | 0.000           |   |
| 0.102E-13   | 0     | 1.000      | 1.000   | 87.700 | 0.000 | 0.000 | 0.0000.1760E+00 | 0 |
| 0.000       | 0.000 | 0.000      |         |        |       |       |                 |   |
| montmor-na  |       |            | 1       | 3      |       |       |                 |   |
| 0.166E-12   | 2     | 1.000      | 1.000   | 35.000 | 0.000 | 0.000 | 0.000           |   |
| 2           |       |            |         |        |       |       |                 |   |
|             |       | 0.1047E-10 | 23.6000 | 1      | h+    |       | 0.3400          |   |
|             |       | 0.3020E-16 | 58.9000 | 1      | h+    |       | -0.4000         |   |
| 0.166E-12   | 0     | 1.000      | 1.000   | 35.000 | 0.000 | 0.000 | 0.0000.8900E-01 | 0 |
| 0.000       | 0.000 | 0.000      |         |        |       |       |                 |   |
| chlorite    |       |            | 1       | 3      |       |       |                 |   |
| 0.302E-12   | 2     | 1.000      | 1.000   | 88.000 | 0.000 | 0.000 | 0.000           |   |
| 1           |       |            |         |        |       |       |                 |   |
|             |       | 0.7762E-11 | 88.0000 | 1      | h+    |       | 0.5000          |   |
| 0.302E-12   | 0     | 1.000      | 1.000   | 88.000 | 0.000 | 0.000 | 0.0000.1760E+00 | 0 |

```

0.000    0.000    0.000
*          0          0

```

The following minerals form ideal solid solutions:

None

'GASES'

\*

'SURFACE COMPLEXES'

\*

'SPECIES W/ Kd and DECAY decay constant(1/s)'

\* 0.0000000000000000E+000

GENERAL CHEMICAL SYSTEM

--> Thermodynamic database: thermodb.txt

'EXCHANGEABLE CATIONS'

|      | master | convention | ex. coef.' |
|------|--------|------------|------------|
| ca+2 | 0      | 3          | 0.40       |
| h+   | 0      | 3          | 0.00       |
| k+   | 0      | 3          | 0.20       |
| mg+2 | 0      | 3          | 0.50       |
| na+  | 1      | 3          | 1.00       |
| *    | 0      | 0          | 0.00       |

| Components | a0    | charge |
|------------|-------|--------|
| alo2-      | 1.810 | -1.0   |
| ca+2       | 2.870 | 2.0    |
| cl-        | 1.810 | -1.0   |
| h+         | 3.080 | 1.0    |
| h2o        | 0.000 | 0.0    |
| hco3-      | 2.100 | -1.0   |
| k+         | 2.270 | 1.0    |
| mg+2       | 2.540 | 2.0    |
| na+        | 1.910 | 1.0    |
| sio2(aq)   | 0.000 | 0.0    |
| so4-2      | 3.150 | -2.0   |
| fe+2       | 2.620 | 2.0    |
| hs-        | 1.810 | -1.0   |
| mn+2       | 2.680 | 2.0    |
| fe+3       | 3.600 | 3.0    |
| nh4+       | 2.410 | 1.0    |
| h2aso3-    | 0.000 | 0.0    |
| h2aso4-    | 0.000 | 0.0    |

Log K interpolation coefficients (a,b,c,d,e)  
valid temperature range (deg.C.): 0.0 to 300.0

|             | a*ln(TK)    | b           | c*TK        | d*(TK)**-1  | e*(TK)**-2  |
|-------------|-------------|-------------|-------------|-------------|-------------|
| as(oh)3(aq) | 0.0000E+00  | -9.2048E+00 | 0.0000E+00  | 0.0000E+00  | 0.0000E+00  |
| aso2-       | 0.0000E+00  | -1.1140E-02 | 0.0000E+00  | 0.0000E+00  | 0.0000E+00  |
| aso2oh-2    | 0.0000E+00  | 1.1017E+01  | 0.0000E+00  | 0.0000E+00  | 0.0000E+00  |
| aso4-3      | 0.0000E+00  | 1.8360E+01  | 0.0000E+00  | 0.0000E+00  | 0.0000E+00  |
| cacl+       | 1.3103E+02  | -8.3024E+02 | -1.3376E-01 | 4.6829E+04  | -2.9136E+06 |
| cacl2(aq)   | 2.6397E+02  | -1.6725E+03 | -2.6682E-01 | 9.3589E+04  | -5.7991E+06 |
| caco3(aq)   | 1.4428E+02  | -9.0987E+02 | -1.4188E-01 | 4.9758E+04  | -2.6449E+06 |
| cahco3+     | 1.4238E+02  | -9.0678E+02 | -1.4307E-01 | 5.1998E+04  | -3.3081E+06 |
| caoh+       | 4.8490E+01  | -3.0192E+02 | -5.1744E-02 | 1.8938E+04  | -8.5279E+05 |
| caso4(aq)   | 2.6777E+02  | -1.7008E+03 | -2.6432E-01 | 9.3540E+04  | -5.5017E+06 |
| fe(oh)2(aq) | -4.9796E+00 | 2.9729E+01  | 6.8993E-03  | 5.0397E+03  | 2.4624E+04  |
| fe(oh)2+    | 0.0000E+00  | 5.6700E+00  | 0.0000E+00  | 0.0000E+00  | 0.0000E+00  |
| fe(oh)3(aq) | 0.0000E+00  | 1.3600E+01  | 0.0000E+00  | 0.0000E+00  | 0.0000E+00  |
| fe(oh)3-    | 0.0000E+00  | 3.2962E+01  | 0.0000E+00  | 0.0000E+00  | 0.0000E+00  |
| fe(oh)4-    | 0.0000E+00  | 2.1000E+01  | 0.0000E+00  | 0.0000E+00  | 0.0000E+00  |
| fecl+       | 1.3604E+02  | -8.6383E+02 | -1.3730E-01 | 4.8907E+04  | -3.0401E+06 |
| fecl2(aq)   | 2.7002E+02  | -1.7116E+03 | -2.7172E-01 | 9.6352E+04  | -5.9118E+06 |
| feco3(aq)   | -4.9426E+02 | 3.1460E+03  | 4.8872E-01  | -1.7444E+05 | 1.0224E+07  |
| feco3+      | 0.0000E+00  | 6.0880E-01  | 0.0000E+00  | 0.0000E+00  | 0.0000E+00  |
| fehco3+     | 1.5321E+02  | -9.6630E+02 | -1.5586E-01 | 5.1442E+04  | -3.0882E+06 |
| feoh+       | 2.8176E+01  | -1.7774E+02 | -2.5611E-02 | 1.2397E+04  | -5.2002E+05 |
| feoh2       | 0.0000E+00  | 2.1900E+00  | 0.0000E+00  | 0.0000E+00  | 0.0000E+00  |
| feso4(aq)   | 2.5058E+02  | -1.5940E+03 | -2.4250E-01 | 8.7676E+04  | -5.1239E+06 |
| h2s(aq)     | 0.0000E+00  | -6.9877E+00 | 0.0000E+00  | 0.0000E+00  | 0.0000E+00  |
| h2sio4-2    | 9.9570E+01  | -6.5687E+02 | -5.1514E-02 | 4.7876E+04  | -2.9104E+06 |
| h2so4(aq)   | 0.0000E+00  | 1.0200E+00  | 0.0000E+00  | 0.0000E+00  | 0.0000E+00  |
| h3aso4(aq)  | 0.0000E+00  | -2.2490E+00 | 0.0000E+00  | 0.0000E+00  | 0.0000E+00  |
| halo2(aq)   | 8.5813E+01  | -5.4438E+02 | -8.8781E-02 | 2.9201E+04  | -1.9974E+06 |
| haso2(aq)   | 0.0000E+00  | -9.2792E+00 | 0.0000E+00  | 0.0000E+00  | 0.0000E+00  |
| haso4-2     | 0.0000E+00  | 6.7583E+00  | 0.0000E+00  | 0.0000E+00  | 0.0000E+00  |
| hass2(aq)   | 0.0000E+00  | -3.0480E+01 | 0.0000E+00  | 0.0000E+00  | 0.0000E+00  |
| hcl(aq)     | 3.1813E+02  | -2.0125E+03 | -3.1404E-01 | 1.0851E+05  | -6.1992E+06 |
| hsio3-      | -5.6009E+00 | 1.2880E+01  | 3.5279E-02  | 8.2277E+03  | -8.1249E+05 |
| hso4-       | 1.5437E+02  | -9.9063E+02 | -1.5057E-01 | 5.8117E+04  | -3.6369E+06 |
| kcl(aq)     | 1.1449E+02  | -7.2588E+02 | -1.1354E-01 | 4.0160E+04  | -2.2906E+06 |
| khso4(aq)   | 2.4309E+02  | -1.5539E+03 | -2.3929E-01 | 9.0003E+04  | -5.5513E+06 |
| koh(aq)     | 0.0000E+00  | 1.4460E+01  | 0.0000E+00  | 0.0000E+00  | 0.0000E+00  |
| kso4-       | 1.5172E+02  | -9.6700E+02 | -1.4844E-01 | 5.4823E+04  | -3.3736E+06 |
| mgcl+       | 1.4464E+02  | -9.2065E+02 | -1.4462E-01 | 5.3131E+04  | -3.4131E+06 |
| mgco3(aq)   | 1.5467E+02  | -9.7579E+02 | -1.4997E-01 | 5.3376E+04  | -2.8826E+06 |
| mgghco3+    | 1.4465E+02  | -9.2374E+02 | -1.4285E-01 | 5.3640E+04  | -3.4446E+06 |
| mgso4(aq)   | 5.4072E+02  | -3.4368E+03 | -5.2632E-01 | 1.8893E+05  | -1.0945E+07 |
| mn(oh)2(aq) | 0.0000E+00  | 2.2200E+01  | 0.0000E+00  | 0.0000E+00  | 0.0000E+00  |
| mn(oh)3-    | 0.0000E+00  | 3.4228E+01  | 0.0000E+00  | 0.0000E+00  | 0.0000E+00  |
| mn2(oh)3+   | 0.0000E+00  | 2.3900E+01  | 0.0000E+00  | 0.0000E+00  | 0.0000E+00  |

|              |             |             |             |             |             |
|--------------|-------------|-------------|-------------|-------------|-------------|
| mn2oh+3      | 0.0000E+00  | 1.0560E+01  | 0.0000E+00  | 0.0000E+00  | 0.0000E+00  |
| mncl+        | 1.4367E+02  | -9.1505E+02 | -1.4582E-01 | 5.2441E+04  | -3.2219E+06 |
| mncl2(aq)    | 0.0000E+00  | -2.5000E-01 | 0.0000E+00  | 0.0000E+00  | 0.0000E+00  |
| mnco3(aq)    | 0.0000E+00  | 5.8090E+00  | 0.0000E+00  | 0.0000E+00  | 0.0000E+00  |
| mnhco3+      | 0.0000E+00  | -8.8200E-01 | 0.0000E+00  | 0.0000E+00  | 0.0000E+00  |
| mnoh+        | 0.0000E+00  | 1.0590E+01  | 0.0000E+00  | 0.0000E+00  | 0.0000E+00  |
| mnso4(aq)    | 2.7771E+02  | -1.7657E+03 | -2.7277E-01 | 9.7419E+04  | -5.7214E+06 |
| naalo2(aq)   | 1.5177E+02  | -9.6704E+02 | -1.4725E-01 | 5.4975E+04  | -3.3276E+06 |
| nacl(aq)     | 1.2748E+02  | -8.0980E+02 | -1.2503E-01 | 4.5318E+04  | -2.7066E+06 |
| naco3-       | 5.5748E+01  | -3.5618E+02 | -2.4308E-02 | 1.9021E+04  | -7.2732E+05 |
| nah3sio4(aq) | -5.2360E+02 | 3.3235E+03  | 5.1452E-01  | -1.7955E+05 | 1.0420E+07  |
| nahco3(aq)   | -1.9296E+02 | 1.2242E+03  | 1.9025E-01  | -6.6962E+04 | 3.8160E+06  |
| naoh(aq)     | -3.9778E+02 | 2.5265E+03  | 3.8913E-01  | -1.3467E+05 | 7.9779E+06  |
| naso4-       | 2.2849E+02  | -1.4587E+03 | -2.1256E-01 | 8.1356E+04  | -4.7528E+06 |
| nh3(aq)      | 0.0000E+00  | 9.2400E+00  | 0.0000E+00  | 0.0000E+00  | 0.0000E+00  |
| nh4so4-      | 0.0000E+00  | -1.0300E+00 | 0.0000E+00  | 0.0000E+00  | 0.0000E+00  |
| al+3         | 3.6067E+01  | -2.2324E+02 | -3.3211E-02 | 4.4829E+03  | -9.1283E+05 |
| co3-2        | -1.2715E+02 | 8.1537E+02  | 1.2850E-01  | -4.5171E+04 | 2.8995E+06  |
| oh-          | -1.1609E+02 | 7.4186E+02  | 1.1647E-01  | -3.8963E+04 | 2.6264E+06  |
| calcite      | 1.4263E+02  | -9.0477E+02 | -1.4455E-01 | 5.0724E+04  | -2.9370E+06 |
| mackinawite  | 0.0000E+00  | -3.6000E+00 | 0.0000E+00  | 0.0000E+00  | 0.0000E+00  |
| orpiment     | 0.0000E+00  | -7.9416E+01 | 0.0000E+00  | 0.0000E+00  | 0.0000E+00  |
| albite       | 4.3838E+02  | -2.8635E+03 | -3.5565E-01 | 1.7711E+05  | -1.2655E+07 |
| annite       | 5.8724E+02  | -3.8145E+03 | -5.0201E-01 | 2.3819E+05  | -1.5466E+07 |
| illite       | 9.7662E+02  | -6.3134E+03 | -8.3515E-01 | 3.6292E+05  | -2.3691E+07 |
| k-feldspar   | 2.2819E+01  | -1.2055E+02 | -4.7299E-02 | -7.0465E+03 | 4.7707E+05  |
| quartz       | -2.3561E+01 | 1.5445E+02  | 1.7816E-02  | -1.0900E+04 | 6.4851E+05  |
| montmor-na   | 6.3477E+02  | -4.1348E+03 | -5.2688E-01 | 2.5007E+05  | -1.7845E+07 |
| chlorite     | 7.3086E+02  | -4.6982E+03 | -6.7072E-01 | 2.7387E+05  | -1.6018E+07 |

Derived Species Reactions

| species      | a0    | charge | logK(25. C) |        | alo2- | ca+2           | cl-  | h+    | h2o  | hco3- | k+   | mg+2 | na+  |
|--------------|-------|--------|-------------|--------|-------|----------------|------|-------|------|-------|------|------|------|
| sio2(aqso4-2 | fe+2  | hs-    | mn+2        | fe+3   | nh4+  | h2aso3-h2aso4- |      |       |      |       |      |      |      |
| as(oh)3(aq)  | 0.000 | 0.0    |             | -9.205 | 0.00  | 0.00           | 0.00 | 1.00  | 0.00 | 0.00  | 0.00 | 0.00 | 0.00 |
| 0.00 0.00    | 0.00  | 0.00   | 0.00        | 0.00   | 0.00  | 1.00           | 0.00 |       |      |       |      |      |      |
| aso2-        | 2.810 | -1.0   |             | -0.011 | 0.00  | 0.00           | 0.00 | -1.00 | 0.00 | 0.00  | 0.00 | 0.00 | 0.00 |
| 0.00 0.00    | 0.00  | 0.00   | 0.00        | 0.00   | 0.00  | 1.00           | 0.00 |       |      |       |      |      |      |
| aso2oh-2     | 2.810 | -2.0   |             | 11.017 | 0.00  | 0.00           | 0.00 | -1.00 | 0.00 | 0.00  | 0.00 | 0.00 | 0.00 |
| 0.00 0.00    | 0.00  | 0.00   | 0.00        | 0.00   | 0.00  | 1.00           | 0.00 |       |      |       |      |      |      |
| aso4-3       | 2.810 | -3.0   |             | 18.360 | 0.00  | 0.00           | 0.00 | -2.00 | 0.00 | 0.00  | 0.00 | 0.00 | 0.00 |
| 0.00 0.00    | 0.00  | 0.00   | 0.00        | 0.00   | 0.00  | 0.00           | 1.00 |       |      |       |      |      |      |
| cacl+        | 2.310 | 1.0    |             | 0.701  | 0.00  | 1.00           | 1.00 | 0.00  | 0.00 | 0.00  | 0.00 | 0.00 | 0.00 |
| 0.00 0.00    | 0.00  | 0.00   | 0.00        | 0.00   | 0.00  | 0.00           | 0.00 |       |      |       |      |      |      |
| cacl2(aq)    | 0.000 | 0.0    |             | 0.654  | 0.00  | 1.00           | 2.00 | 0.00  | 0.00 | 0.00  | 0.00 | 0.00 | 0.00 |
| 0.00 0.00    | 0.00  | 0.00   | 0.00        | 0.00   | 0.00  | 0.00           | 0.00 |       |      |       |      |      |      |
| caco3(aq)    | 0.000 | 0.0    |             | 7.009  | 0.00  | 1.00           | 0.00 | -1.00 | 0.00 | 1.00  | 0.00 | 0.00 | 0.00 |

|             |      |       |      |      |        |      |      |      |       |       |      |      |      |      |
|-------------|------|-------|------|------|--------|------|------|------|-------|-------|------|------|------|------|
| 0.00        | 0.00 | 0.00  | 0.00 | 0.00 | 0.00   | 0.00 | 0.00 | 0.00 | 0.00  | 0.00  | 0.00 | 0.00 | 0.00 | 0.00 |
| cahco3+     |      | 2.310 | 1.0  |      | -1.043 | 0.00 | 1.00 | 0.00 | 0.00  | 0.00  | 1.00 | 0.00 | 0.00 | 0.00 |
| 0.00        | 0.00 | 0.00  | 0.00 | 0.00 | 0.00   | 0.00 | 0.00 | 0.00 | 0.00  | 0.00  | 0.00 | 0.00 | 0.00 | 0.00 |
| caoh+       |      | 2.310 | 1.0  |      | 12.852 | 0.00 | 1.00 | 0.00 | -1.00 | 1.00  | 0.00 | 0.00 | 0.00 | 0.00 |
| 0.00        | 0.00 | 0.00  | 0.00 | 0.00 | 0.00   | 0.00 | 0.00 | 0.00 | 0.00  | 0.00  | 0.00 | 0.00 | 0.00 | 0.00 |
| caso4(aq)   |      | 0.000 | 0.0  |      | -2.100 | 0.00 | 1.00 | 0.00 | 0.00  | 0.00  | 0.00 | 0.00 | 0.00 | 0.00 |
| 0.00        | 1.00 | 0.00  | 0.00 | 0.00 | 0.00   | 0.00 | 0.00 | 0.00 | 0.00  | 0.00  | 0.00 | 0.00 | 0.00 | 0.00 |
| fe(oh)2(aq) |      | 0.000 | 0.0  |      | 20.595 | 0.00 | 0.00 | 0.00 | -2.00 | 2.00  | 0.00 | 0.00 | 0.00 | 0.00 |
| 0.00        | 0.00 | 1.00  | 0.00 | 0.00 | 0.00   | 0.00 | 0.00 | 0.00 | 0.00  | 0.00  | 0.00 | 0.00 | 0.00 | 0.00 |
| fe(oh)2+    |      | 2.310 | 1.0  |      | 5.670  | 0.00 | 0.00 | 0.00 | -2.00 | 2.00  | 0.00 | 0.00 | 0.00 | 0.00 |
| 0.00        | 0.00 | 0.00  | 0.00 | 0.00 | 1.00   | 0.00 | 0.00 | 0.00 | 0.00  | 0.00  | 0.00 | 0.00 | 0.00 | 0.00 |
| fe(oh)3(aq) |      | 0.000 | 0.0  |      | 13.600 | 0.00 | 0.00 | 0.00 | -3.00 | 3.00  | 0.00 | 0.00 | 0.00 | 0.00 |
| 0.00        | 0.00 | 0.00  | 0.00 | 0.00 | 1.00   | 0.00 | 0.00 | 0.00 | 0.00  | 0.00  | 0.00 | 0.00 | 0.00 | 0.00 |
| fe(oh)3-    |      | 1.810 | -1.0 |      | 32.962 | 0.00 | 0.00 | 0.00 | -3.00 | 3.00  | 0.00 | 0.00 | 0.00 | 0.00 |
| 0.00        | 0.00 | 1.00  | 0.00 | 0.00 | 0.00   | 0.00 | 0.00 | 0.00 | 0.00  | 0.00  | 0.00 | 0.00 | 0.00 | 0.00 |
| fe(oh)4-    |      | 1.810 | -1.0 |      | 21.000 | 0.00 | 0.00 | 0.00 | -4.00 | 4.00  | 0.00 | 0.00 | 0.00 | 0.00 |
| 0.00        | 0.00 | 0.00  | 0.00 | 0.00 | 1.00   | 0.00 | 0.00 | 0.00 | 0.00  | 0.00  | 0.00 | 0.00 | 0.00 | 0.00 |
| fecl+       |      | 2.310 | 1.0  |      | 0.165  | 0.00 | 0.00 | 1.00 | 0.00  | 0.00  | 0.00 | 0.00 | 0.00 | 0.00 |
| 0.00        | 0.00 | 1.00  | 0.00 | 0.00 | 0.00   | 0.00 | 0.00 | 0.00 | 0.00  | 0.00  | 0.00 | 0.00 | 0.00 | 0.00 |
| fec12(aq)   |      | 0.000 | 0.0  |      | 2.464  | 0.00 | 0.00 | 2.00 | 0.00  | 0.00  | 0.00 | 0.00 | 0.00 | 0.00 |
| 0.00        | 0.00 | 1.00  | 0.00 | 0.00 | 0.00   | 0.00 | 0.00 | 0.00 | 0.00  | 0.00  | 0.00 | 0.00 | 0.00 | 0.00 |
| feco3(aq)   |      | 0.000 | 0.0  |      | 5.568  | 0.00 | 0.00 | 0.00 | -1.00 | 0.00  | 1.00 | 0.00 | 0.00 | 0.00 |
| 0.00        | 0.00 | 1.00  | 0.00 | 0.00 | 0.00   | 0.00 | 0.00 | 0.00 | 0.00  | 0.00  | 0.00 | 0.00 | 0.00 | 0.00 |
| feco3+      |      | 0.000 | 1.0  |      | 0.609  | 0.00 | 0.00 | 0.00 | -1.00 | 0.00  | 1.00 | 0.00 | 0.00 | 0.00 |
| 0.00        | 0.00 | 0.00  | 0.00 | 0.00 | 1.00   | 0.00 | 0.00 | 0.00 | 0.00  | 0.00  | 0.00 | 0.00 | 0.00 | 0.00 |
| fehco3+     |      | 2.310 | 1.0  |      | -2.044 | 0.00 | 0.00 | 0.00 | 0.00  | 0.00  | 1.00 | 0.00 | 0.00 | 0.00 |
| 0.00        | 0.00 | 1.00  | 0.00 | 0.00 | 0.00   | 0.00 | 0.00 | 0.00 | 0.00  | 0.00  | 0.00 | 0.00 | 0.00 | 0.00 |
| feoh+       |      | 2.310 | 1.0  |      | 10.895 | 0.00 | 0.00 | 0.00 | -1.00 | 1.00  | 0.00 | 0.00 | 0.00 | 0.00 |
| 0.00        | 0.00 | 1.00  | 0.00 | 0.00 | 0.00   | 0.00 | 0.00 | 0.00 | 0.00  | 0.00  | 0.00 | 0.00 | 0.00 | 0.00 |
| feoh+2      |      | 2.800 | 2.0  |      | 2.190  | 0.00 | 0.00 | 0.00 | -1.00 | 1.00  | 0.00 | 0.00 | 0.00 | 0.00 |
| 0.00        | 0.00 | 0.00  | 0.00 | 0.00 | 1.00   | 0.00 | 0.00 | 0.00 | 0.00  | 0.00  | 0.00 | 0.00 | 0.00 | 0.00 |
| feso4(aq)   |      | 0.000 | 0.0  |      | -2.189 | 0.00 | 0.00 | 0.00 | 0.00  | 0.00  | 0.00 | 0.00 | 0.00 | 0.00 |
| 0.00        | 1.00 | 1.00  | 0.00 | 0.00 | 0.00   | 0.00 | 0.00 | 0.00 | 0.00  | 0.00  | 0.00 | 0.00 | 0.00 | 0.00 |
| h2s(aq)     |      | 0.000 | 0.0  |      | -6.988 | 0.00 | 0.00 | 0.00 | 1.00  | 0.00  | 0.00 | 0.00 | 0.00 | 0.00 |
| 0.00        | 0.00 | 0.00  | 1.00 | 0.00 | 0.00   | 0.00 | 0.00 | 0.00 | 0.00  | 0.00  | 0.00 | 0.00 | 0.00 | 0.00 |
| h2sio4-2    |      | 3.000 | -2.0 |      | 22.910 | 0.00 | 0.00 | 0.00 | -2.00 | 2.00  | 0.00 | 0.00 | 0.00 | 0.00 |
| 1.00        | 0.00 | 0.00  | 0.00 | 0.00 | 0.00   | 0.00 | 0.00 | 0.00 | 0.00  | 0.00  | 0.00 | 0.00 | 0.00 | 0.00 |
| h2so4(aq)   |      | 0.000 | 0.0  |      | 1.020  | 0.00 | 0.00 | 0.00 | 2.00  | 0.00  | 0.00 | 0.00 | 0.00 | 0.00 |
| 0.00        | 1.00 | 0.00  | 0.00 | 0.00 | 0.00   | 0.00 | 0.00 | 0.00 | 0.00  | 0.00  | 0.00 | 0.00 | 0.00 | 0.00 |
| h3aso4(aq)  |      | 3.000 | 0.0  |      | -2.249 | 0.00 | 0.00 | 0.00 | 1.00  | 0.00  | 0.00 | 0.00 | 0.00 | 0.00 |
| 0.00        | 0.00 | 0.00  | 0.00 | 0.00 | 0.00   | 0.00 | 0.00 | 1.00 | 0.00  | 0.00  | 0.00 | 0.00 | 0.00 | 0.00 |
| halo2(aq)   |      | 0.000 | 0.0  |      | -6.448 | 1.00 | 0.00 | 0.00 | 1.00  | 0.00  | 0.00 | 0.00 | 0.00 | 0.00 |
| 0.00        | 0.00 | 0.00  | 0.00 | 0.00 | 0.00   | 0.00 | 0.00 | 0.00 | 0.00  | 0.00  | 0.00 | 0.00 | 0.00 | 0.00 |
| haso2(aq)   |      | 3.000 | 0.0  |      | -9.279 | 0.00 | 0.00 | 0.00 | 1.00  | -1.00 | 0.00 | 0.00 | 0.00 | 0.00 |
| 0.00        | 0.00 | 0.00  | 0.00 | 0.00 | 0.00   | 0.00 | 1.00 | 0.00 | 0.00  | 0.00  | 0.00 | 0.00 | 0.00 | 0.00 |
| haso4-2     |      | 3.000 | -2.0 |      | 6.758  | 0.00 | 0.00 | 0.00 | -1.00 | 0.00  | 0.00 | 0.00 | 0.00 | 0.00 |

|             |      |       |      |      |         |      |      |      |       |       |      |      |      |      |      |
|-------------|------|-------|------|------|---------|------|------|------|-------|-------|------|------|------|------|------|
| 0.00        | 0.00 | 0.00  | 0.00 | 0.00 | 0.00    | 0.00 | 0.00 | 1.00 |       |       |      |      |      |      |      |
| hass2(aq)   |      | 0.000 | 0.0  |      | -30.480 | 0.00 | 0.00 | 0.00 | 3.00  | -3.00 | 0.00 | 0.00 | 0.00 | 0.00 | 0.00 |
| 0.00        | 0.00 | 0.00  | 2.00 | 0.00 | 0.00    | 0.00 | 1.00 | 0.00 |       |       |      |      |      |      |      |
| hcl(aq)     |      | 0.000 | 0.0  |      | 0.700   | 0.00 | 0.00 | 1.00 | 1.00  | 0.00  | 0.00 | 0.00 | 0.00 | 0.00 | 0.00 |
| 0.00        | 0.00 | 0.00  | 0.00 | 0.00 | 0.00    | 0.00 | 0.00 | 0.00 |       |       |      |      |      |      |      |
| hsio3-      |      | 1.810 | -1.0 |      | 9.942   | 0.00 | 0.00 | 0.00 | -1.00 | 1.00  | 0.00 | 0.00 | 0.00 | 0.00 | 0.00 |
| 1.00        | 0.00 | 0.00  | 0.00 | 0.00 | 0.00    | 0.00 | 0.00 | 0.00 |       |       |      |      |      |      |      |
| hso4-       |      | 2.370 | -1.0 |      | -1.974  | 0.00 | 0.00 | 0.00 | 1.00  | 0.00  | 0.00 | 0.00 | 0.00 | 0.00 | 0.00 |
| 0.00        | 1.00 | 0.00  | 0.00 | 0.00 | 0.00    | 0.00 | 0.00 | 0.00 |       |       |      |      |      |      |      |
| kcl(aq)     |      | 0.000 | 0.0  |      | 1.500   | 0.00 | 0.00 | 1.00 | 0.00  | 0.00  | 0.00 | 1.00 | 0.00 | 0.00 | 0.00 |
| 0.00        | 0.00 | 0.00  | 0.00 | 0.00 | 0.00    | 0.00 | 0.00 | 0.00 |       |       |      |      |      |      |      |
| khso4(aq)   |      | 0.000 | 0.0  |      | -0.806  | 0.00 | 0.00 | 0.00 | 1.00  | 0.00  | 0.00 | 1.00 | 0.00 | 0.00 | 0.00 |
| 0.00        | 1.00 | 0.00  | 0.00 | 0.00 | 0.00    | 0.00 | 0.00 | 0.00 |       |       |      |      |      |      |      |
| koh(aq)     |      | 0.000 | 0.0  |      | 14.460  | 0.00 | 0.00 | 0.00 | -1.00 | 1.00  | 0.00 | 1.00 | 0.00 | 0.00 | 0.00 |
| 0.00        | 0.00 | 0.00  | 0.00 | 0.00 | 0.00    | 0.00 | 0.00 | 0.00 |       |       |      |      |      |      |      |
| kso4-       |      | 1.810 | -1.0 |      | -0.875  | 0.00 | 0.00 | 0.00 | 0.00  | 0.00  | 0.00 | 1.00 | 0.00 | 0.00 | 0.00 |
| 0.00        | 1.00 | 0.00  | 0.00 | 0.00 | 0.00    | 0.00 | 0.00 | 0.00 |       |       |      |      |      |      |      |
| mgcl+       |      | 2.310 | 1.0  |      | 0.139   | 0.00 | 0.00 | 1.00 | 0.00  | 0.00  | 0.00 | 0.00 | 1.00 | 0.00 | 0.00 |
| 0.00        | 0.00 | 0.00  | 0.00 | 0.00 | 0.00    | 0.00 | 0.00 | 0.00 |       |       |      |      |      |      |      |
| mgco3(aq)   |      | 0.000 | 0.0  |      | 7.356   | 0.00 | 0.00 | 0.00 | -1.00 | 0.00  | 1.00 | 0.00 | 1.00 | 0.00 | 0.00 |
| 0.00        | 0.00 | 0.00  | 0.00 | 0.00 | 0.00    | 0.00 | 0.00 | 0.00 |       |       |      |      |      |      |      |
| mghco3+     |      | 2.310 | 1.0  |      | -1.033  | 0.00 | 0.00 | 0.00 | 0.00  | 0.00  | 1.00 | 0.00 | 1.00 | 0.00 | 0.00 |
| 0.00        | 0.00 | 0.00  | 0.00 | 0.00 | 0.00    | 0.00 | 0.00 | 0.00 |       |       |      |      |      |      |      |
| mgso4(aq)   |      | 0.000 | 0.0  |      | -2.382  | 0.00 | 0.00 | 0.00 | 0.00  | 0.00  | 0.00 | 0.00 | 0.00 | 1.00 | 0.00 |
| 0.00        | 1.00 | 0.00  | 0.00 | 0.00 | 0.00    | 0.00 | 0.00 | 0.00 |       |       |      |      |      |      |      |
| mn(oh)2(aq) |      | 0.000 | 0.0  |      | 22.200  | 0.00 | 0.00 | 0.00 | -2.00 | 2.00  | 0.00 | 0.00 | 0.00 | 0.00 | 0.00 |
| 0.00        | 0.00 | 0.00  | 0.00 | 1.00 | 0.00    | 0.00 | 0.00 | 0.00 |       |       |      |      |      |      |      |
| mn(oh)3-    |      | 1.810 | -1.0 |      | 34.228  | 0.00 | 0.00 | 0.00 | -3.00 | 3.00  | 0.00 | 0.00 | 0.00 | 0.00 | 0.00 |
| 0.00        | 0.00 | 0.00  | 0.00 | 1.00 | 0.00    | 0.00 | 0.00 | 0.00 |       |       |      |      |      |      |      |
| mn2(oh)3+   |      | 2.310 | 1.0  |      | 23.900  | 0.00 | 0.00 | 0.00 | -3.00 | 3.00  | 0.00 | 0.00 | 0.00 | 0.00 | 0.00 |
| 0.00        | 0.00 | 0.00  | 0.00 | 2.00 | 0.00    | 0.00 | 0.00 | 0.00 |       |       |      |      |      |      |      |
| mn2oh+3     |      | 3.600 | 3.0  |      | 10.560  | 0.00 | 0.00 | 0.00 | -1.00 | 1.00  | 0.00 | 0.00 | 0.00 | 0.00 | 0.00 |
| 0.00        | 0.00 | 0.00  | 0.00 | 2.00 | 0.00    | 0.00 | 0.00 | 0.00 |       |       |      |      |      |      |      |
| mncl+       |      | 2.310 | 1.0  |      | -0.297  | 0.00 | 0.00 | 1.00 | 0.00  | 0.00  | 0.00 | 0.00 | 0.00 | 0.00 | 0.00 |
| 0.00        | 0.00 | 0.00  | 0.00 | 1.00 | 0.00    | 0.00 | 0.00 | 0.00 |       |       |      |      |      |      |      |
| mncl2(aq)   |      | 0.000 | 0.0  |      | -0.250  | 0.00 | 0.00 | 2.00 | 0.00  | 0.00  | 0.00 | 0.00 | 0.00 | 0.00 | 0.00 |
| 0.00        | 0.00 | 0.00  | 0.00 | 1.00 | 0.00    | 0.00 | 0.00 | 0.00 |       |       |      |      |      |      |      |
| mnco3(aq)   |      | 0.000 | 0.0  |      | 5.809   | 0.00 | 0.00 | 0.00 | -1.00 | 0.00  | 1.00 | 0.00 | 0.00 | 0.00 | 0.00 |
| 0.00        | 0.00 | 0.00  | 0.00 | 1.00 | 0.00    | 0.00 | 0.00 | 0.00 |       |       |      |      |      |      |      |
| mnhco3+     |      | 2.310 | 1.0  |      | -0.882  | 0.00 | 0.00 | 0.00 | 0.00  | 0.00  | 1.00 | 0.00 | 0.00 | 0.00 | 0.00 |
| 0.00        | 0.00 | 0.00  | 0.00 | 1.00 | 0.00    | 0.00 | 0.00 | 0.00 |       |       |      |      |      |      |      |
| mnoh+       |      | 2.310 | 1.0  |      | 10.590  | 0.00 | 0.00 | 0.00 | -1.00 | 1.00  | 0.00 | 0.00 | 0.00 | 0.00 | 0.00 |
| 0.00        | 0.00 | 0.00  | 0.00 | 1.00 | 0.00    | 0.00 | 0.00 | 0.00 |       |       |      |      |      |      |      |
| mnso4(aq)   |      | 0.000 | 0.0  |      | -2.342  | 0.00 | 0.00 | 0.00 | 0.00  | 0.00  | 0.00 | 0.00 | 0.00 | 0.00 | 0.00 |
| 0.00        | 1.00 | 0.00  | 0.00 | 1.00 | 0.00    | 0.00 | 0.00 | 0.00 |       |       |      |      |      |      |      |
| naalo2(aq)  |      | 0.000 | 0.0  |      | 0.748   | 1.00 | 0.00 | 0.00 | 0.00  | 0.00  | 0.00 | 0.00 | 0.00 | 0.00 | 1.00 |

|              |      |       |      |      |         |      |      |      |       |       |      |      |      |      |      |
|--------------|------|-------|------|------|---------|------|------|------|-------|-------|------|------|------|------|------|
| 0.00         | 0.00 | 0.00  | 0.00 | 0.00 | 0.00    | 0.00 | 0.00 | 0.00 | 0.00  | 0.00  | 0.00 | 0.00 | 0.00 | 0.00 | 1.00 |
| nacl(aq)     |      | 0.000 | 0.0  |      | 0.782   | 0.00 | 0.00 | 1.00 | 0.00  | 0.00  | 0.00 | 0.00 | 0.00 | 0.00 | 1.00 |
| 0.00         | 0.00 | 0.00  | 0.00 | 0.00 | 0.00    | 0.00 | 0.00 | 0.00 | 0.00  | 0.00  | 0.00 | 0.00 | 0.00 | 0.00 | 1.00 |
| naco3-       |      | 1.810 | -1.0 |      | 9.816   | 0.00 | 0.00 | 0.00 | -1.00 | 0.00  | 1.00 | 0.00 | 0.00 | 0.00 | 1.00 |
| 0.00         | 0.00 | 0.00  | 0.00 | 0.00 | 0.00    | 0.00 | 0.00 | 0.00 | 0.00  | 0.00  | 0.00 | 0.00 | 0.00 | 0.00 | 1.00 |
| nah3sio4(aq) |      | 0.000 | 0.0  |      | 8.622   | 0.00 | 0.00 | 0.00 | -1.00 | 2.00  | 0.00 | 0.00 | 0.00 | 0.00 | 1.00 |
| 1.00         | 0.00 | 0.00  | 0.00 | 0.00 | 0.00    | 0.00 | 0.00 | 0.00 | 0.00  | 0.00  | 0.00 | 0.00 | 0.00 | 0.00 | 1.00 |
| nahco3(aq)   |      | 0.000 | 0.0  |      | -0.170  | 0.00 | 0.00 | 0.00 | 0.00  | 0.00  | 1.00 | 0.00 | 0.00 | 0.00 | 1.00 |
| 0.00         | 0.00 | 0.00  | 0.00 | 0.00 | 0.00    | 0.00 | 0.00 | 0.00 | 0.00  | 0.00  | 0.00 | 0.00 | 0.00 | 0.00 | 1.00 |
| naoh(aq)     |      | 0.000 | 0.0  |      | 14.154  | 0.00 | 0.00 | 0.00 | -1.00 | 1.00  | 0.00 | 0.00 | 0.00 | 0.00 | 1.00 |
| 0.00         | 0.00 | 0.00  | 0.00 | 0.00 | 0.00    | 0.00 | 0.00 | 0.00 | 0.00  | 0.00  | 0.00 | 0.00 | 0.00 | 0.00 | 1.00 |
| naso4-       |      | 1.810 | -1.0 |      | -0.811  | 0.00 | 0.00 | 0.00 | 0.00  | 0.00  | 0.00 | 0.00 | 0.00 | 0.00 | 1.00 |
| 0.00         | 1.00 | 0.00  | 0.00 | 0.00 | 0.00    | 0.00 | 0.00 | 0.00 | 0.00  | 0.00  | 0.00 | 0.00 | 0.00 | 0.00 | 0.00 |
| nh3(aq)      |      | 0.000 | 0.0  |      | 9.240   | 0.00 | 0.00 | 0.00 | -1.00 | 0.00  | 0.00 | 0.00 | 0.00 | 0.00 | 0.00 |
| 0.00         | 0.00 | 0.00  | 0.00 | 0.00 | 0.00    | 1.00 | 0.00 | 0.00 | 0.00  | 0.00  | 0.00 | 0.00 | 0.00 | 0.00 | 0.00 |
| nh4so4-      |      | 5.000 | -1.0 |      | -1.030  | 0.00 | 0.00 | 0.00 | 0.00  | 0.00  | 0.00 | 0.00 | 0.00 | 0.00 | 0.00 |
| 0.00         | 1.00 | 0.00  | 0.00 | 0.00 | 0.00    | 1.00 | 0.00 | 0.00 | 0.00  | 0.00  | 0.00 | 0.00 | 0.00 | 0.00 | 0.00 |
| al+3         |      | 3.330 | 3.0  |      | -22.879 | 1.00 | 0.00 | 0.00 | 4.00  | -2.00 | 0.00 | 0.00 | 0.00 | 0.00 | 0.00 |
| 0.00         | 0.00 | 0.00  | 0.00 | 0.00 | 0.00    | 0.00 | 0.00 | 0.00 | 0.00  | 0.00  | 0.00 | 0.00 | 0.00 | 0.00 | 0.00 |
| co3-2        |      | 2.810 | -2.0 |      | 10.325  | 0.00 | 0.00 | 0.00 | -1.00 | 0.00  | 1.00 | 0.00 | 0.00 | 0.00 | 0.00 |
| 0.00         | 0.00 | 0.00  | 0.00 | 0.00 | 0.00    | 0.00 | 0.00 | 0.00 | 0.00  | 0.00  | 0.00 | 0.00 | 0.00 | 0.00 | 0.00 |
| oh-          |      | 1.400 | -1.0 |      | 13.991  | 0.00 | 0.00 | 0.00 | -1.00 | 1.00  | 0.00 | 0.00 | 0.00 | 0.00 | 0.00 |
| 0.00         | 0.00 | 0.00  | 0.00 | 0.00 | 0.00    | 0.00 | 0.00 | 0.00 | 0.00  | 0.00  | 0.00 | 0.00 | 0.00 | 0.00 | 0.00 |

Mineral Reactions

| minerals     | m.vol(L/mol) | logK(25. C) | alo2- | ca+2 | cl-  | h+             | h2o   | hco3- | k+   | mg+2 | na+  |
|--------------|--------------|-------------|-------|------|------|----------------|-------|-------|------|------|------|
| sio2(aqso4-2 | fe+2         | hs-         | mn+2  | fe+3 | nh4+ | h2aso3-h2aso4- |       |       |      |      |      |
| calcite      | 0.0369       | 1.854       | 0.00  | 1.00 | 0.00 | -1.00          | 0.00  | 1.00  | 0.00 | 0.00 | 0.00 |
| 0.00         | 0.00         | 0.00        | 0.00  | 0.00 | 0.00 | 0.00           | 0.00  | 0.00  | 0.00 | 0.00 | 0.00 |
| mackinawite  | 0.5000       | -3.600      | 0.00  | 0.00 | 0.00 | -1.00          | 0.00  | 0.00  | 0.00 | 0.00 | 0.00 |
| 0.00         | 1.00         | 1.00        | 0.00  | 0.00 | 0.00 | 0.00           | 0.00  | 0.00  | 0.00 | 0.00 | 0.00 |
| orpiment     | 0.0705       | -79.416     | 0.00  | 0.00 | 0.00 | 5.00           | -6.00 | 0.00  | 0.00 | 0.00 | 0.00 |
| 0.00         | 0.00         | 3.00        | 0.00  | 0.00 | 0.00 | 2.00           | 0.00  | 0.00  | 0.00 | 0.00 | 0.00 |
| albite       | 0.1003       | -20.133     | 1.00  | 0.00 | 0.00 | 0.00           | 0.00  | 0.00  | 0.00 | 0.00 | 1.00 |
| 0.00         | 0.00         | 0.00        | 0.00  | 0.00 | 0.00 | 0.00           | 0.00  | 0.00  | 0.00 | 0.00 | 3.00 |
| annite       | 0.1543       | 6.574       | 1.00  | 0.00 | 0.00 | -6.00          | 4.00  | 0.00  | 1.00 | 0.00 | 0.00 |
| 0.00         | 3.00         | 0.00        | 0.00  | 0.00 | 0.00 | 0.00           | 0.00  | 0.00  | 0.00 | 0.00 | 3.00 |
| illite       | 0.1389       | -47.328     | 2.30  | 0.00 | 0.00 | 1.20           | 0.40  | 0.00  | 0.60 | 0.25 | 0.00 |
| 0.00         | 0.00         | 0.00        | 0.00  | 0.00 | 0.00 | 0.00           | 0.00  | 0.00  | 0.00 | 0.00 | 3.50 |
| k-feldspar   | 0.1089       | -22.910     | 1.00  | 0.00 | 0.00 | 0.00           | 0.00  | 0.00  | 1.00 | 0.00 | 0.00 |
| 0.00         | 0.00         | 0.00        | 0.00  | 0.00 | 0.00 | 0.00           | 0.00  | 0.00  | 0.00 | 0.00 | 3.00 |
| quartz       | 0.0227       | -3.745      | 0.00  | 0.00 | 0.00 | 0.00           | 0.00  | 0.00  | 0.00 | 0.00 | 0.00 |
| 0.00         | 0.00         | 0.00        | 0.00  | 0.00 | 0.00 | 0.00           | 0.00  | 0.00  | 0.00 | 0.00 | 1.00 |
| montmor-na   | 0.1343       | -37.175     | 1.67  | 0.00 | 0.00 | 0.68           | 0.66  | 0.00  | 0.00 | 0.33 | 0.33 |
| 0.00         | 0.00         | 0.00        | 0.00  | 0.00 | 0.00 | 0.00           | 0.00  | 0.00  | 0.00 | 0.33 | 4.00 |
| chlorite     | 0.2103       | 4.298       | 2.00  | 0.00 | 0.00 | -8.00          | 8.00  | 0.00  | 0.00 | 2.50 | 0.00 |

0.00 2.50 0.00 0.00 0.00 0.00 0.00 0.00

'INITIAL AND BOUNDARY WATER TYPES'

number of initial-water types= 4  
 number of boundary (+ injecting) water types= 1

Initial Water Type = 1

water temperature (C)= 8.75

|          | icon | guess      | ctot       | nameq | qksat |
|----------|------|------------|------------|-------|-------|
| alo2-    | 1    | 0.7083E-07 | 0.7083E-07 |       |       |
| ca+2     | 1    | 0.3121E-03 | 0.3121E-03 |       |       |
| cl-      | 1    | 0.6240E-03 | 0.6240E-03 |       |       |
| h+       | 3    | 0.7405E-08 | 0.7405E-08 |       |       |
| h2o      | 1    | 0.1000E+01 | 0.1000E+01 |       |       |
| hco3-    | 1    | 0.6256E-02 | 0.6256E-02 |       |       |
| k+       | 1    | 0.1126E-04 | 0.1126E-04 |       |       |
| mg+2     | 1    | 0.7809E-03 | 0.7809E-03 |       |       |
| na+      | 1    | 0.4753E-02 | 0.4753E-02 |       |       |
| sio2(aq) | 1    | 0.8739E-04 | 0.8739E-04 |       |       |
| so4-2    | 1    | 0.5768E-04 | 0.5768E-04 |       |       |
| fe+2     | 1    | 0.1433E-05 | 0.1433E-05 |       |       |
| hs-      | 1    | 0.4680E-06 | 0.4680E-06 |       |       |
| mn+2     | 1    | 0.2344E-05 | 0.2344E-05 |       |       |
| fe+3     | 1    | 0.1335E-05 | 0.1335E-05 |       |       |
| nh4+     | 1    | 0.1429E-04 | 0.1429E-04 |       |       |
| h2aso3-  | 1    | 0.1855E-04 | 0.1855E-04 |       |       |
| h2aso4-  | 1    | 0.2792E-05 | 0.2792E-05 |       |       |
| *        | 0    | 0.0000E+00 | 0.0000E+00 |       |       |

Initial Water Type = 2

water temperature (C)= 8.90

|          | icon | guess      | ctot       | nameq | qksat |
|----------|------|------------|------------|-------|-------|
| alo2-    | 1    | 0.2170E-06 | 0.2170E-06 |       |       |
| ca+2     | 1    | 0.3848E-03 | 0.3848E-03 |       |       |
| cl-      | 1    | 0.7466E-03 | 0.7466E-03 |       |       |
| h+       | 3    | 0.1273E-07 | 0.1273E-07 |       |       |
| h2o      | 1    | 0.1000E+01 | 0.1000E+01 |       |       |
| hco3-    | 1    | 0.8063E-02 | 0.8063E-02 |       |       |
| k+       | 1    | 0.1357E-04 | 0.1357E-04 |       |       |
| mg+2     | 1    | 0.7761E-03 | 0.7761E-03 |       |       |
| na+      | 1    | 0.6895E-02 | 0.6895E-02 |       |       |
| sio2(aq) | 1    | 0.9474E-04 | 0.9474E-04 |       |       |
| so4-2    | 1    | 0.3759E-03 | 0.3759E-03 |       |       |
| fe+2     | 1    | 0.4301E-05 | 0.4301E-05 |       |       |
| hs-      | 1    | 0.9363E-06 | 0.9363E-06 |       |       |
| mn+2     | 1    | 0.3348E-05 | 0.3348E-05 |       |       |

|         |   |            |            |
|---------|---|------------|------------|
| fe+3    | 1 | 0.5680E-06 | 0.5680E-06 |
| nh4+    | 1 | 0.1093E-03 | 0.1093E-03 |
| h2aso3- | 1 | 0.2518E-04 | 0.2518E-04 |
| h2aso4- | 1 | 0.9908E-05 | 0.9908E-05 |
| *       | 0 | 0.0000E+00 | 0.0000E+00 |

Initial Water Type = 3

water temperature (C)= 8.51

|          |   | icon       | guess | ctot       | nameq | qksat' |
|----------|---|------------|-------|------------|-------|--------|
| alo2-    | 1 | 0.2066E-06 |       | 0.2066E-06 |       |        |
| ca+2     | 1 | 0.6154E-03 |       | 0.6154E-03 |       |        |
| cl-      | 1 | 0.6257E-02 |       | 0.6257E-02 |       |        |
| h+       | 3 | 0.2313E-07 |       | 0.2313E-07 |       |        |
| h2o      | 1 | 0.1000E+01 |       | 0.1000E+01 |       |        |
| hco3-    | 1 | 0.7584E-02 |       | 0.7584E-02 |       |        |
| k+       | 1 | 0.2842E-04 |       | 0.2842E-04 |       |        |
| mg+2     | 1 | 0.1344E-02 |       | 0.1344E-02 |       |        |
| na+      | 1 | 0.1043E-01 |       | 0.1043E-01 |       |        |
| sio2(aq) | 1 | 0.8277E-04 |       | 0.8277E-04 |       |        |
| so4-2    | 1 | 0.5211E-04 |       | 0.5211E-04 |       |        |
| fe+2     | 1 | 0.3585E-06 |       | 0.3585E-06 |       |        |
| hs-      | 1 | 0.9147E-05 |       | 0.9147E-05 |       |        |
| mn+2     | 1 | 0.2915E-05 |       | 0.2915E-05 |       |        |
| fe+3     | 1 | 0.1524E-05 |       | 0.1524E-05 |       |        |
| nh4+     | 1 | 0.6503E-04 |       | 0.6503E-04 |       |        |
| h2aso3-  | 1 | 0.9486E-07 |       | 0.9486E-07 |       |        |
| h2aso4-  | 1 | 0.2044E-06 |       | 0.2044E-06 |       |        |
| *        | 0 | 0.0000E+00 |       | 0.0000E+00 |       |        |

Initial Water Type = 4

water temperature (C)= 8.40

|          |   | icon       | guess | ctot       | nameq | qksat' |
|----------|---|------------|-------|------------|-------|--------|
| alo2-    | 1 | 0.2236E-06 |       | 0.2236E-06 |       |        |
| ca+2     | 1 | 0.4790E-03 |       | 0.4790E-03 |       |        |
| cl-      | 1 | 0.7874E-03 |       | 0.7874E-03 |       |        |
| h+       | 3 | 0.1550E-07 |       | 0.1550E-07 |       |        |
| h2o      | 1 | 0.1000E+01 |       | 0.1000E+01 |       |        |
| hco3-    | 1 | 0.6332E-02 |       | 0.6332E-02 |       |        |
| k+       | 1 | 0.1331E-04 |       | 0.1331E-04 |       |        |
| mg+2     | 1 | 0.9341E-03 |       | 0.9341E-03 |       |        |
| na+      | 1 | 0.4090E-02 |       | 0.4090E-02 |       |        |
| sio2(aq) | 1 | 0.1276E-03 |       | 0.1276E-03 |       |        |
| so4-2    | 1 | 0.8313E-04 |       | 0.8313E-04 |       |        |
| fe+2     | 1 | 0.7166E-06 |       | 0.7166E-06 |       |        |
| hs-      | 1 | 0.3744E-06 |       | 0.3744E-06 |       |        |
| mn+2     | 1 | 0.2725E-05 |       | 0.2725E-05 |       |        |

|         |   |            |            |
|---------|---|------------|------------|
| fe+3    | 1 | 0.7919E-06 | 0.7919E-06 |
| nh4+    | 1 | 0.2286E-04 | 0.2286E-04 |
| h2aso3- | 1 | 0.3628E-05 | 0.3628E-05 |
| h2aso4- | 1 | 0.2814E-05 | 0.2814E-05 |
| *       | 0 | 0.0000E+00 | 0.0000E+00 |

Boundary (+ injection) Water Type = 1  
 water temperature (C)= 8.40

|          |   | icon       | guess | ctot       | constrain' |
|----------|---|------------|-------|------------|------------|
| alo2-    | 1 | 0.2236E-06 |       | 0.2236E-06 |            |
| ca+2     | 1 | 0.4790E-03 |       | 0.4790E-03 |            |
| cl-      | 1 | 0.7874E-03 |       | 0.7874E-03 |            |
| h+       | 3 | 0.1550E-07 |       | 0.1550E-07 |            |
| h2o      | 1 | 0.1000E+01 |       | 0.1000E+01 |            |
| hco3-    | 1 | 0.6332E-02 |       | 0.6332E-02 |            |
| k+       | 1 | 0.1331E-04 |       | 0.1331E-04 |            |
| mg+2     | 1 | 0.9341E-03 |       | 0.9341E-03 |            |
| na+      | 1 | 0.4090E-02 |       | 0.4090E-02 |            |
| sio2(aq) | 1 | 0.1276E-03 |       | 0.1276E-03 |            |
| so4-2    | 1 | 0.8313E-04 |       | 0.8313E-04 |            |
| fe+2     | 1 | 0.7166E-06 |       | 0.7166E-06 |            |
| hs-      | 1 | 0.3744E-06 |       | 0.3744E-06 |            |
| mn+2     | 1 | 0.2725E-05 |       | 0.2725E-05 |            |
| fe+3     | 1 | 0.7919E-06 |       | 0.7919E-06 |            |
| nh4+     | 1 | 0.2286E-04 |       | 0.2286E-04 |            |
| h2aso3-  | 1 | 0.3628E-05 |       | 0.3628E-05 |            |
| h2aso4-  | 1 | 0.2814E-05 |       | 0.2814E-05 |            |
| *        | 0 | 0.0000E+00 |       | 0.0000E+00 |            |

-----  
 'INITIAL MINERAL ZONES'

total number of mineral zones= 1  
 MINERAL ZONE= 1

| 'mineral    | vol.frac.  | msw33'      |
|-------------|------------|-------------|
| calcite     | 0.9700E-01 | equilibrium |
| mackinawite | 0.0000E+00 | equilibrium |
| orpiment    | 0.0000E+00 | equilibrium |
| albite      | 0.5600E-01 | kinetic     |
| 0.1000E-02  | 0.9800E+01 | 0           |
| annite      | 0.2030E+00 | kinetic     |
| 0.1000E-02  | 0.9800E+01 | 0           |
| illite      | 0.2040E+00 | kinetic     |
| 0.1000E-02  | 0.1516E+03 | 0           |
| k-feldspar  | 0.9000E-02 | kinetic     |
| 0.1000E-02  | 0.9800E+01 | 0           |
| quartz      | 0.1760E+00 | kinetic     |

```

0.1000E-02  0.9800E+01  0
montmor-na  0.8900E-01 kinetic
0.1000E-02  0.1516E+03  0
chlorite    0.1760E+00 kinetic
0.1000E-02  0.9800E+01  0
Sum of mineral volume fractions in zone: 0.1010E+01

```

```

-----
INITIAL GAS ZONES
total number of gas zones= 1
gas ZONE= 1
'gas      partial pressure'
-----
PERMEABILITY-POROSITY
total number of permeability zones= 1
1
'perm law  a-par    b-par'
3          .00E+00      .00E+00
-----
INITIAL SURFACE ADSORPTION ZONES
total number of adsorption zones= 0
'zone      ad.surf.(m2/kg)  total ad.sites (mol/l)'
-----
'INITIAL LINEAR EQUILIBRIUM Kd ZONES'
total number of Kd zones= 1
Kd ZONE= 1
'species   solid-density(Sden,kg/dm**3)  Kd(l/kg=mass/kg solid / mass/l'
*          0.0000E+00.0000E+00
-----
'INITIAL ZONES OF CATION EXCHANGE'
total number of cation-exchange zones= 1
'zone      ex. capacity'
1          14.40
-----
'
--> read input data complete

```
